# Supplementary material
Source: PubMed Central journal article supplement (PMC3338253)
Supplement: supp_111.136549_FigureS6.pdf [file supp_111.136549_FigureS6.pdf]

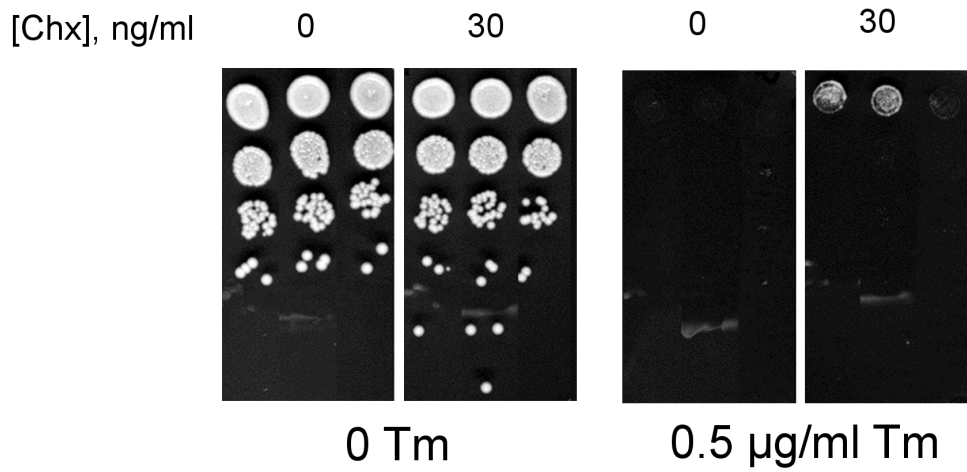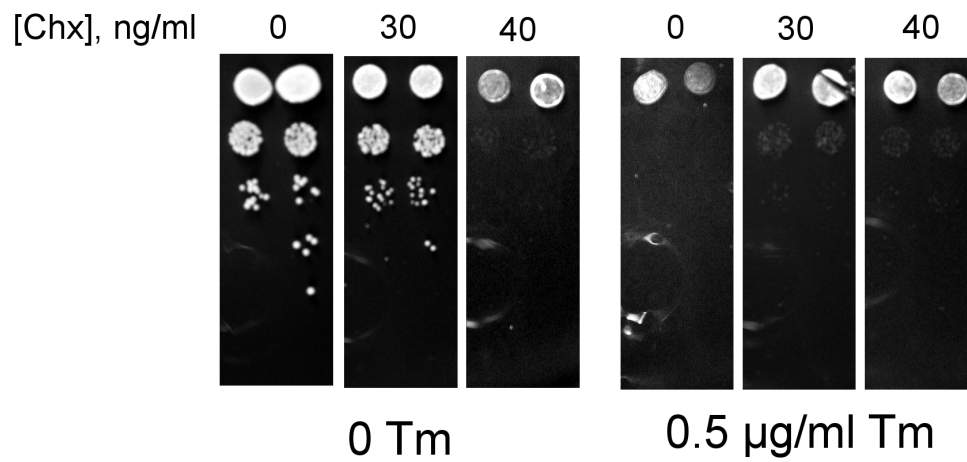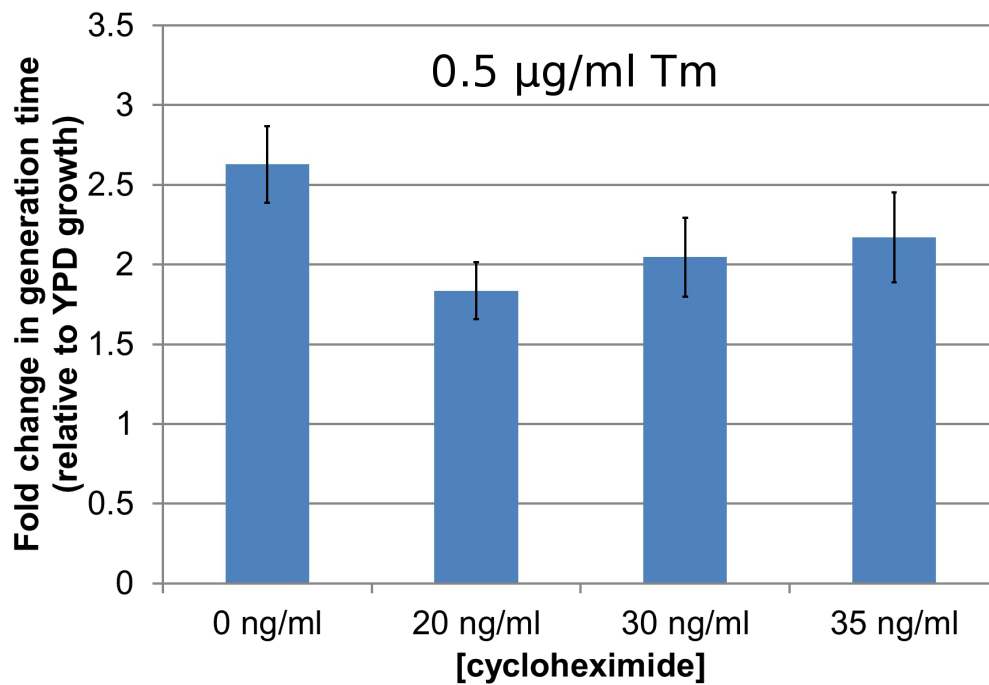

**Figure S6** Cells treated with cycloheximide (Chx) are partially resistant to tunicamycin (Tm). Tenfold serial dilutions of saturated yeast cultures were spotted on YPD plates containing 0 or 0.5 μg/ml tunicamycin, at the indicated concentrations of cycloheximide.
